# Supplementary material for: Noncovalent interaction of polyethylene glycol with copper complex of ethylenediaminetetraacetic acid and its application in constructing inorganic nanomaterials
Source: Royal Society of Chemistry journal article supplement (doi:10.1039/c1dt11090j), 2011-01-01

# Supporting Information

## Noncovalent Interaction of Polyethylene Glycol with Copper Complex of Ethylenediaminetetraacetic Acid and Its Application in Constructing Inorganic Nanomaterials

Shu Zhen Pan<sup>a</sup>, Le Xin Song<sup>\*a,b</sup>, Jie Chen<sup>a</sup>, Fang Yun Du<sup>a</sup>, Jing Yang<sup>a</sup> and Juan Xia<sup>a</sup>

<sup>a</sup> Department of Chemistry, University of Science and Technology of China, Hefei 230026, P. R. China

<sup>b</sup> State Key Laboratory of Coordination Chemistry, Nanjing University, Nanjing 210093, P. R. China

solexin@ustc.edu.cn

### A list of the contents for all the supporting information

| Page | Contents                                                                                                                                                                                                                                                                                                                               |
|------|----------------------------------------------------------------------------------------------------------------------------------------------------------------------------------------------------------------------------------------------------------------------------------------------------------------------------------------|
| 1    | A table of contents page.                                                                                                                                                                                                                                                                                                              |
| 2    | Fig. 1. The $\ln\eta_r$ values of (A) PEG-a ( $1.00 \times 10^{-2} \text{ mol}\cdot\text{dm}^{-3}$ ), (B) PEG-b, (C) PEG-c and (D) PEG-d as a function of concentrations of (a) $\text{Na}_2\text{H}_2\text{Y}$ and (b) $\text{CuCl}_2$ in the concentration range from 0.00 to $1.00 \times 10^{-2} \text{ mol}\cdot\text{dm}^{-3}$ . |
| 3    | Fig. 2. $\kappa$ as a function of (a) $\text{CuCl}_2$ ( $1.00 \times 10^{-4} \text{ mol}\cdot\text{dm}^{-3}$ ) and (b) $\text{Na}_2\text{H}_2\text{Y}$ ( $1.00 \times 10^{-4} \text{ mol}\cdot\text{dm}^{-3}$ ) to the initial concentration of (A) PEG-a, (B) PEG-b, (C) PEG-c and (D) PEG-d.                                         |

**Fig. 1** The  $\ln\eta_r$  values of (A) PEG-a ( $1.00 \times 10^{-2} \text{ mol}\cdot\text{dm}^{-3}$ ), (B) PEG-b, (C) PEG-c and (D) PEG-d as a function of concentrations of (a)  $\text{Na}_2\text{H}_2\text{Y}$  and (b)  $\text{CuCl}_2$  in the concentration range from 0.00 to  $1.00 \times 10^{-2} \text{ mol}\cdot\text{dm}^{-3}$ .

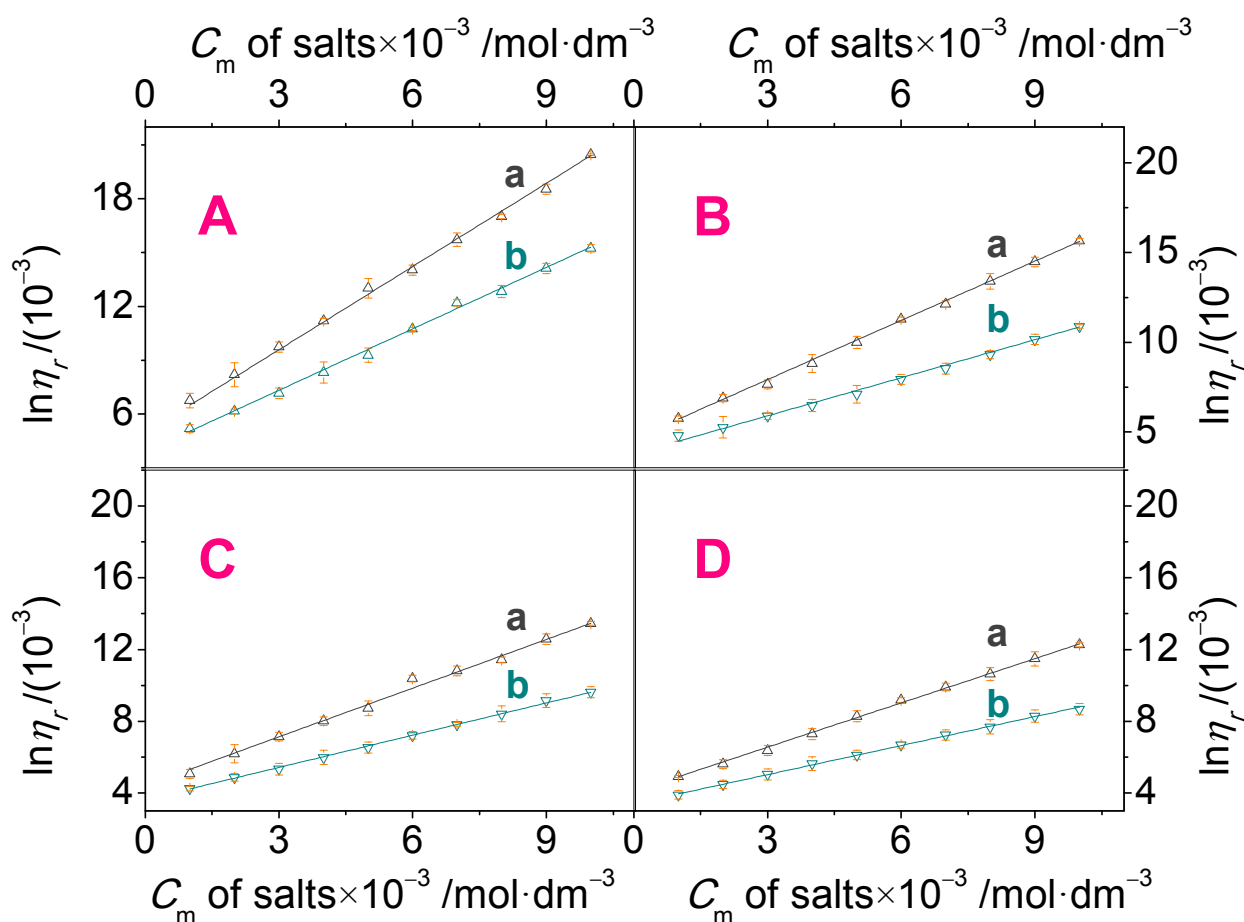

**Fig. 2**  $\kappa$  as a function of (a)  $\text{CuCl}_2$  ( $1.00 \times 10^{-4} \text{ mol}\cdot\text{dm}^{-3}$ ) and (b)  $\text{Na}_2\text{H}_2\text{Y}$  ( $1.00 \times 10^{-4} \text{ mol}\cdot\text{dm}^{-3}$ ) to the initial concentration of (A) PEG-a, (B) PEG-b, (C) PEG-c and (D) PEG-d.

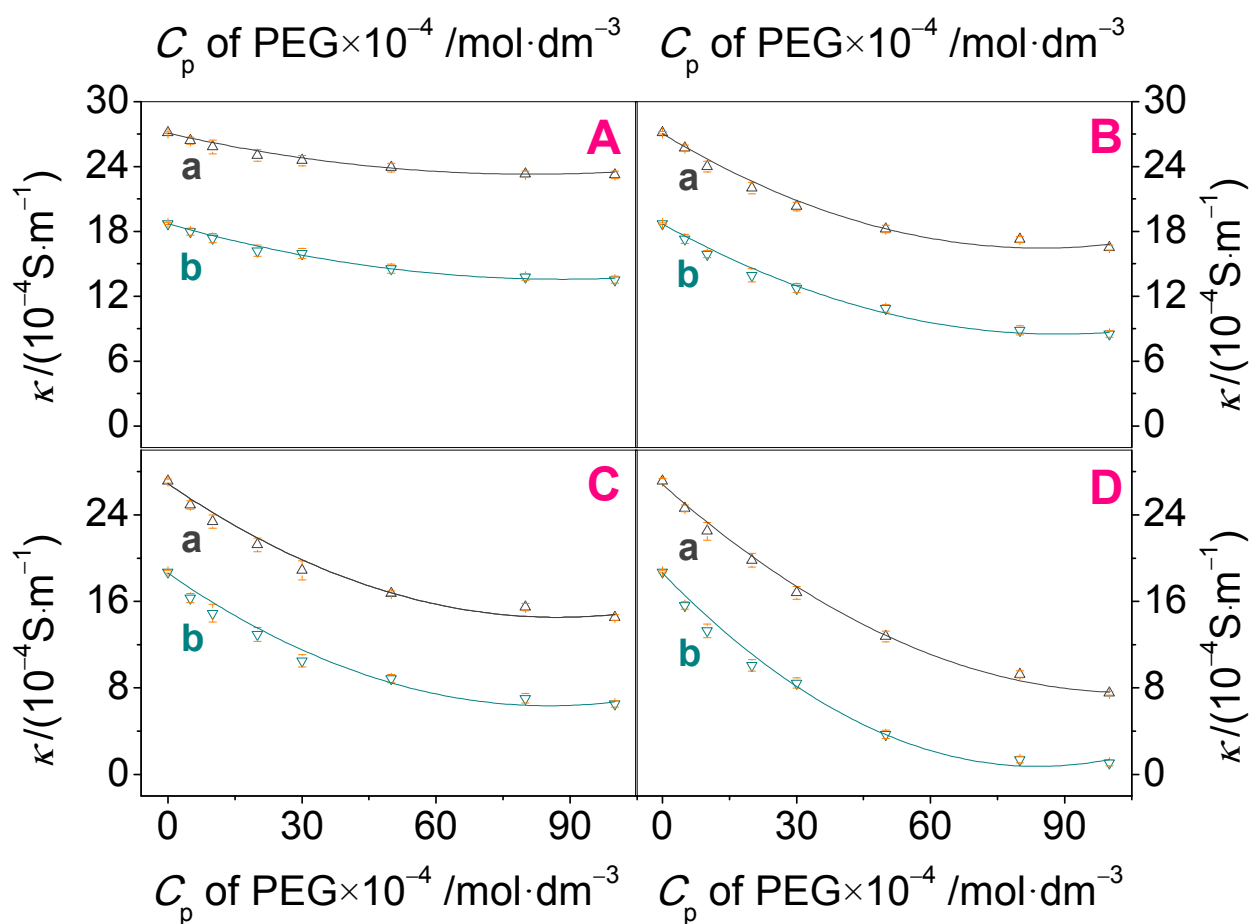

Supplement: c1dt11090j.pdf [file c1dt11090j.pdf]
